# Supplementary material for: Highly water-dispersible calcium lignosulfonate-capped MnO nanoparticles as a T1 MRI contrast agent with exceptional colloidal stability, low toxicity and remarkable relaxivity
Source: Royal Society of Chemistry journal article supplement (doi:10.1039/c9ra09125d), 2019-01-01
Supplement: c9ra09125d1.pdf [file c9ra09125d1.pdf]

**Highly water-dispersible calcium lignosulfonate-capped MnO nanoparticles  
as a T<sub>1</sub> MRI contrast agent with exceptional colloidal stability, low toxicity  
and remarkable relaxivity**

*Mahdi Arian, Ali Zamanian, Salman Taheri*

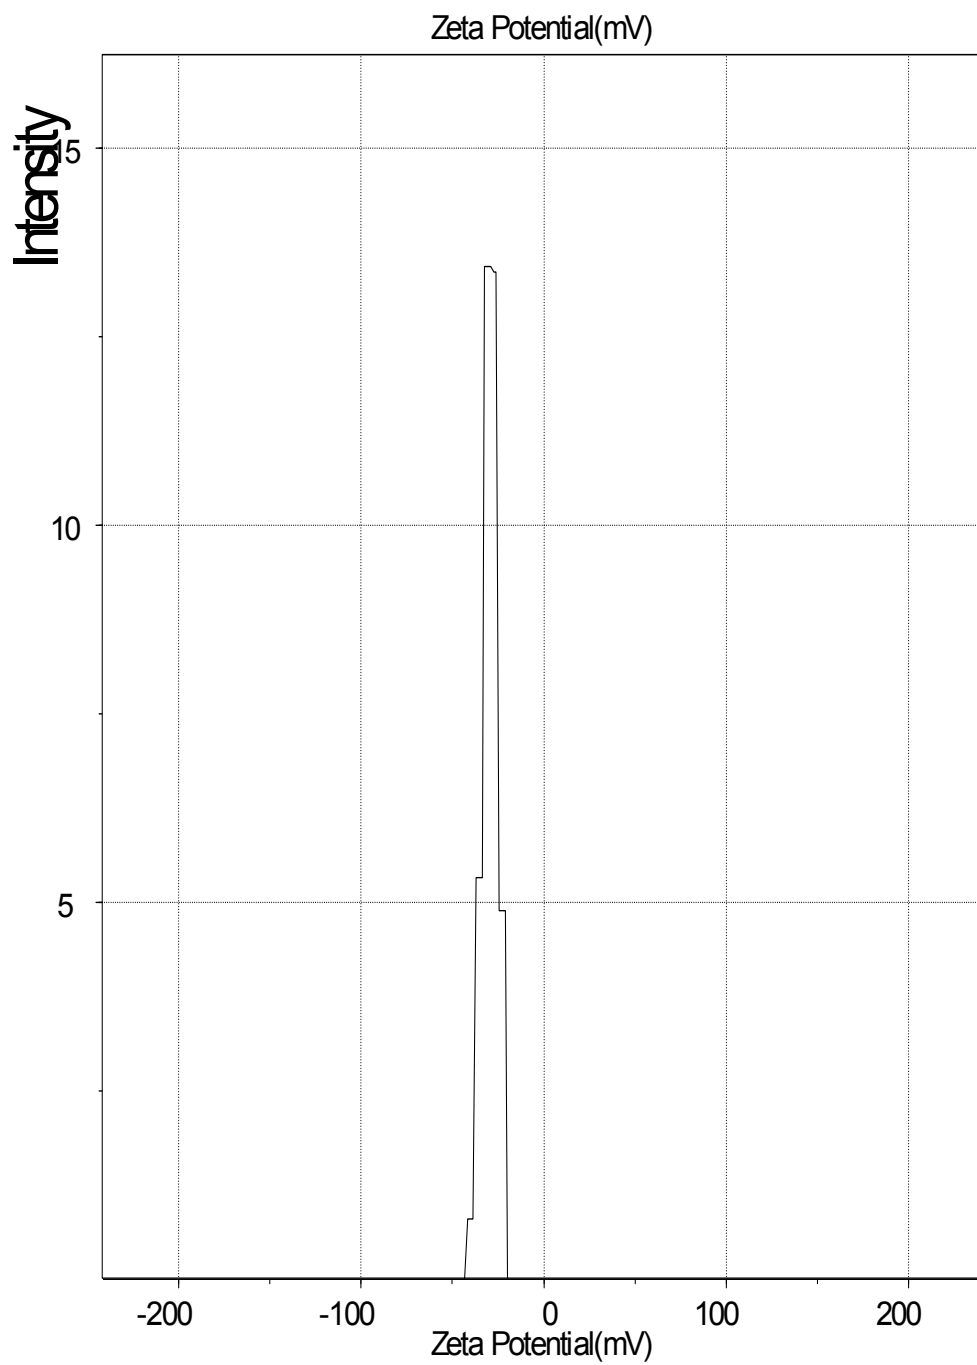

**Figure S1.** Zeta potential of hydrophilic manganese oxide nanoparticles with calcium lignosulfonate coating (MnO-CaLs NPs) depicts the surface charge is -29 mV.

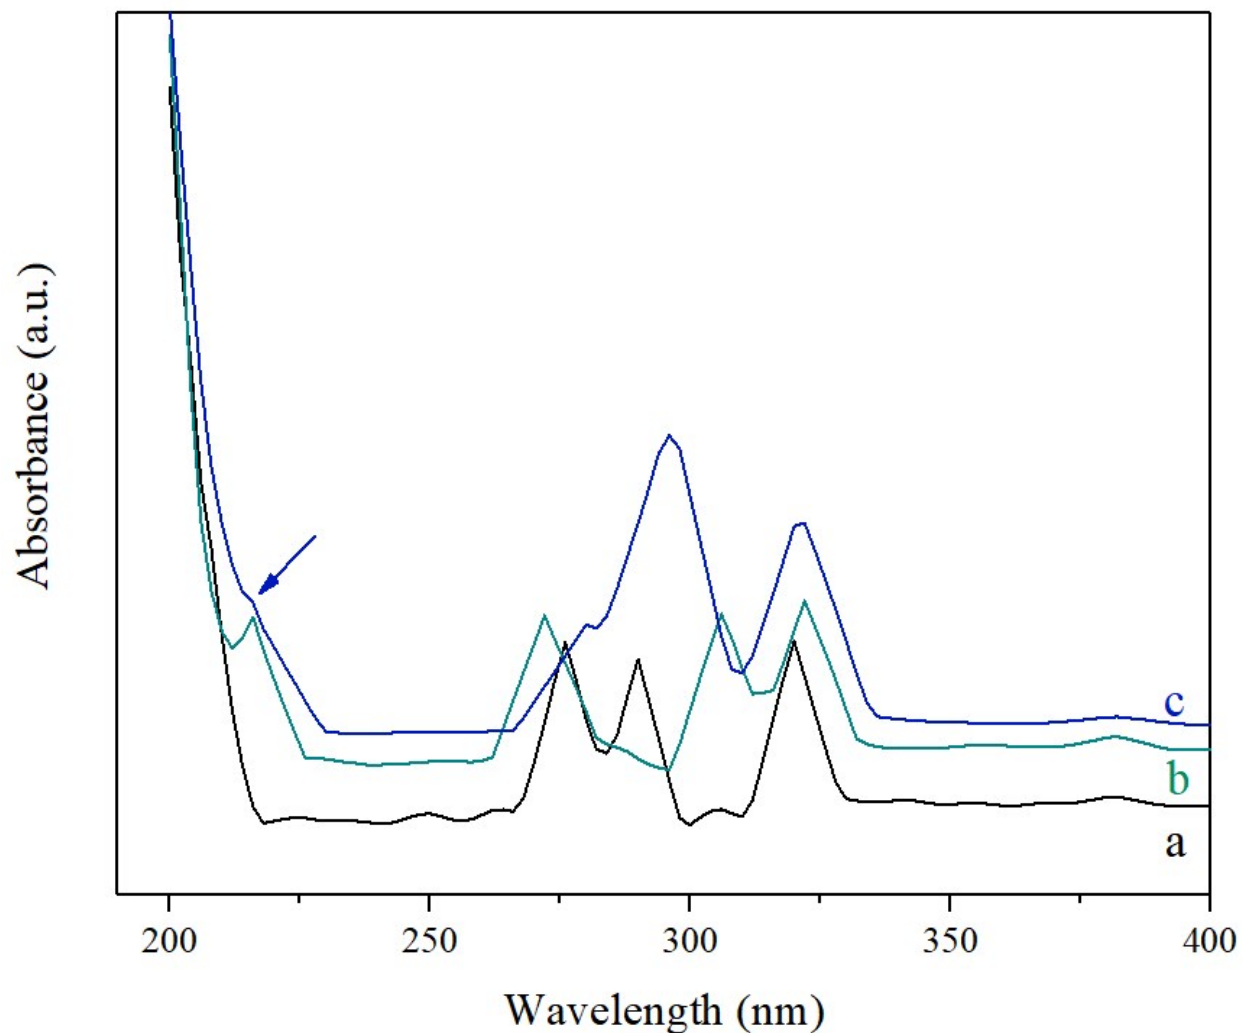

**Figure S2.** Solid-state UV absorption spectra: a) manganese oxide nanoparticles before phase transfer (with oleic acid coating); b) calcium lignosulfonate (CaLs); and c) manganese oxide nanoparticles after phase transfer (with calcium lignosulfonate coating) show a characteristic shoulders ( $\lambda \approx 216$  nm), which attributed to CaLs coating on the MnO NPs surface (shown by arrow).

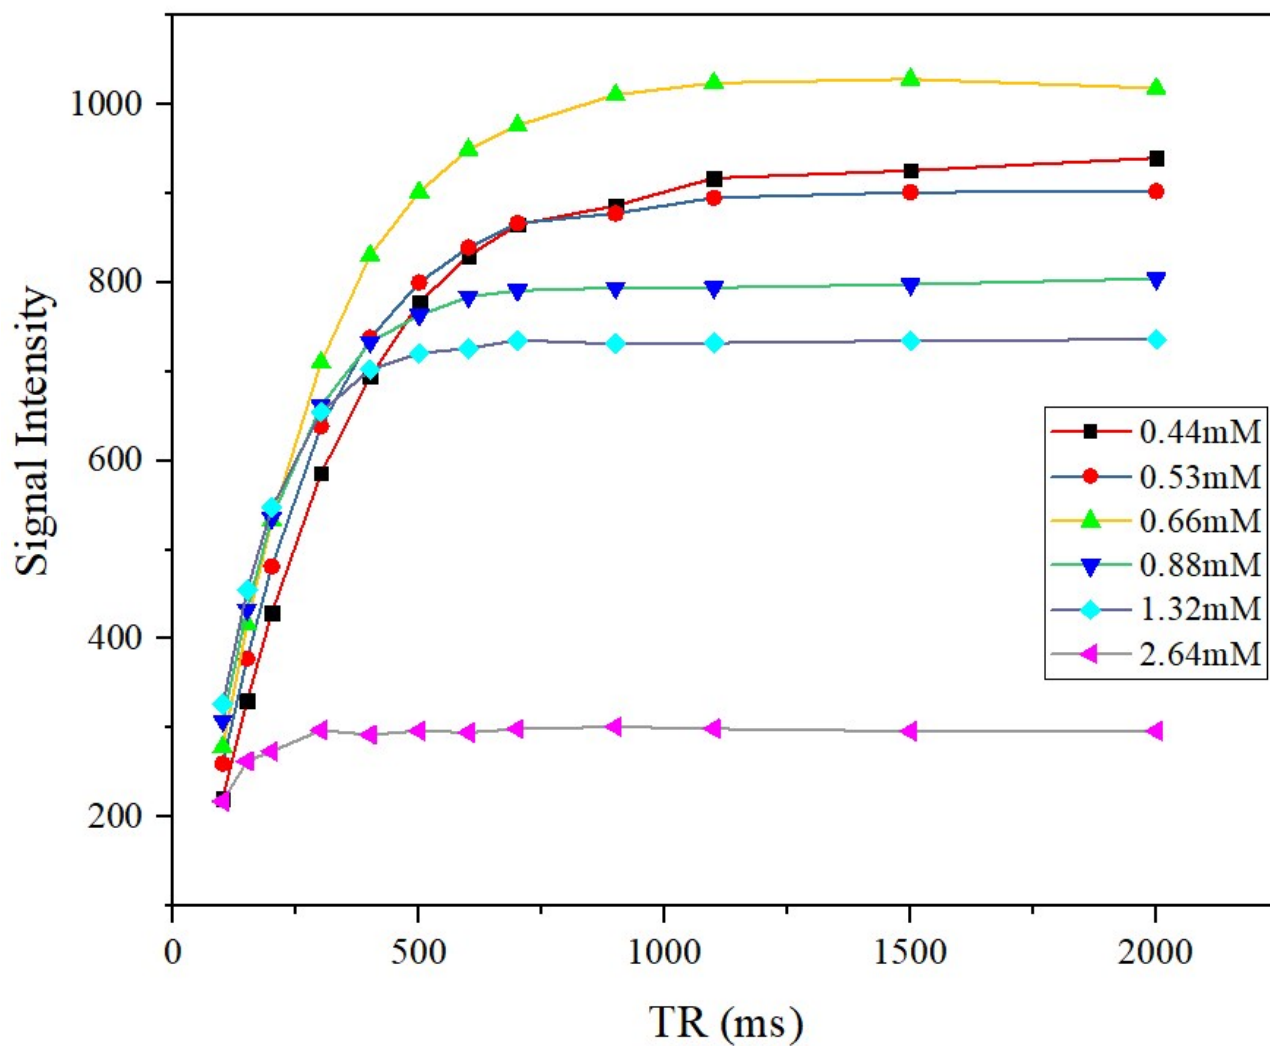

**Figure S3.** Signal intensity against TR in  $T_1$ -weighted MRI images (longitudinal relaxation) for different concentration of manganese ion, which maximum signal intensity was observed at 0.66 mM.

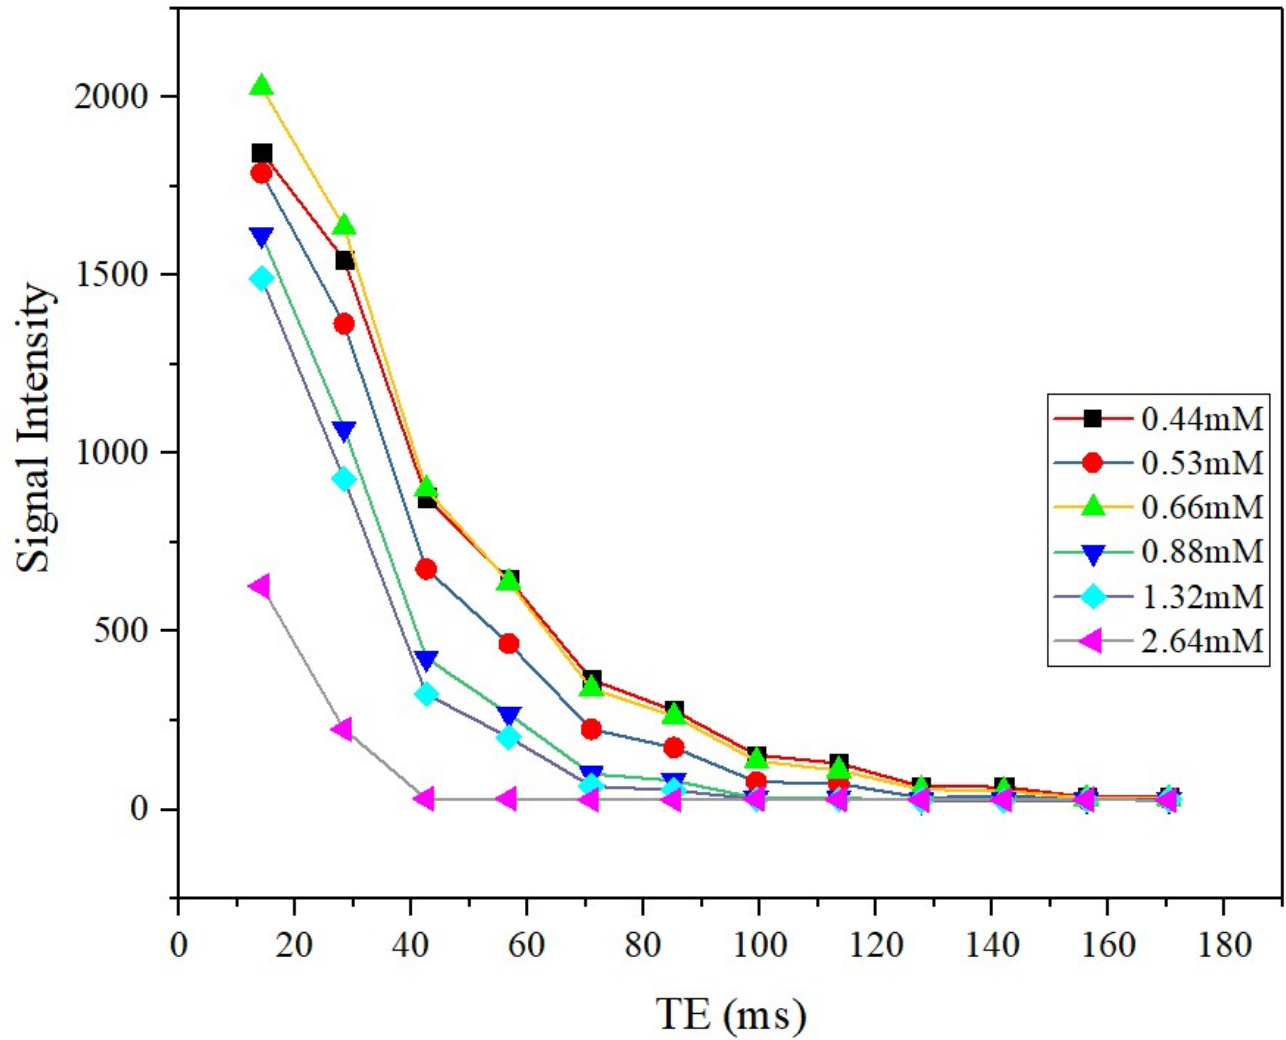

**Figure S4.** Signal intensity against TE in T<sub>2</sub>-weighted MRI images (transverse relaxation) for different concentration of manganese ion.
